# Supplementary material
Source: publisher site journal article supplement (https://kjim.org/upload/media/kjim-2024-364-Supplementary-Table-1.pdf)
Supplement: Supplementary file 1 [file kjim-2024-364-Supplementary-Table-1.pdf]

**Supplementary Table 1. Independent predictors for sick sinus syndrome among the patients who received ILR implantation for unexplained syncope (LAVI as a continuous variable)**

| Variable                                            | Univariate analysis |                | Multivariate analysis <sup>a)</sup> |                |
|-----------------------------------------------------|---------------------|----------------|-------------------------------------|----------------|
|                                                     | HR (95% CI)         | <i>p</i> value | HR (95% CI)                         | <i>p</i> value |
| Age                                                 | 1.020 (1.009–1.031) | < 0.001        | 1.007 (0.989–1.025)                 | 0.459          |
| Sex, male                                           | 1.136 (0.841–1.533) | 0.406          | 0.941 (0.610–1.452)                 | 0.784          |
| Diabetes mellitus                                   | 1.398 (0.984–1.987) | 0.062          | 0.989 (0.609–1.605)                 | 0.963          |
| Hypertension                                        | 1.655 (1.223–2.238) | 0.001          | 1.894 (1.196–3.001)                 | 0.007          |
| Structural heart disease <sup>b)</sup>              | 1.206 (0.864–1.684) | 0.270          | 1.113 (0.720–1.722)                 | 0.630          |
| Bradycardia less than 60 BPM                        | 1.796 (1.314–2.455) | < 0.001        | 1.604 (1.020–2.524)                 | 0.041          |
| PR interval, per 1ms increase                       | 1.005 (1.001–1.010) | 0.013          | 1.002 (0.995–1.009)                 | 0.597          |
| QRS duration, per 1ms increase                      | 1.001 (0.992–1.009) | 0.894          | 0.993 (0.978–1.008)                 | 0.333          |
| Any intraventricular conduction delay <sup>c)</sup> | 1.124 (0.671–1.881) | 0.658          | 2.048 (0.870–4.822)                 | 0.101          |
| LVEF, per 1% increase                               | 0.995 (0.974–1.016) | 0.620          | 0.988 (0.964–1.013)                 | 0.351          |
| LAVI, per 1 mL/m <sup>2</sup> increase              | 1.011 (1.006–1.016) | < 0.001        | 1.023 (1.008–1.039)                 | 0.003          |

ILR, implantable loop recorder; LAVI, left atrial volume index; HR, hazard ratio; CI, confidence interval; BPM, beats per minute; LVEF, left ventricular ejection fraction; ICMP, ischemic cardiomyopathy; DCMP, dilated cardiomyopathy; HCMP, hypertrophic cardiomyopathy; RBBB, right bundle branch block; LBBB, left bundle branch block; LAFB, left anterior fascicular block; LPFB, left posterior fascicular block.

<sup>a)</sup>The discriminant ability of multivariable model was 0.680 (95% CI 0.625–0.734). All variables in Supplementary Table 1 were used for adjustment.

<sup>b)</sup>Structural heart disease included coronary artery disease, ICMP, DCMP, HCMP, other congestive heart failure, and moderate to severe valvular heart disease.

<sup>c)</sup>Any intraventricular conduction delay included RBBB, LBBB, LAFB, LPFB, and bifascicular block.
